# Supplementary material for: A novel organotrophic nitrate-reducing Fe(ii)-oxidizing bacterium isolated from paddy soil and draft genome sequencing indicate its metabolic versatility
Source: Royal Society of Chemistry journal article supplement (doi:10.1039/c7ra09328d), 2017-01-01
Supplement: c7ra09328d1.pdf [file c7ra09328d1.pdf]

## Supplementary information for

# A Novel Organotrophic Nitrate-reducing Fe(II)-oxidizing Bacterium Isolated from a Paddy Soil and Draft Genome Sequencing Indicates its Metabolic Versatility

Min Hu<sup>1†</sup>, Pengcheng Chen<sup>1,2,3†</sup>, Weimin Sun<sup>4</sup>, Fangbai Li<sup>1\*</sup>, Jianghu Cui<sup>1</sup>

<sup>1</sup> Guangdong Key Laboratory of Integrated Agro-environmental Pollution Control and Management, Guangdong Institute of Eco-Environmental Science & Technology, Guangzhou 510650, P. R. China

<sup>2</sup> Guangzhou Institute of Geochemistry, Chinese Academy of Sciences, Guangzhou 510640, P. R. China

<sup>3</sup> Graduate University of the Chinese Academy of Sciences, Beijing 100039, P. R. China.

<sup>4</sup> Department of Biochemistry and Microbiology, Rutgers University, New Brunswick 08901, NJ, USA

†These authors contributed equally to this work.

\* Corresponding author. Tel.: +86 20 37021396; Fax: +86 20 87024123.

E-mail address: cefbli@soil.gd.cn.

Running title: Nitrate-reducing Fe(II)-oxidizer from paddy soil

Table S1. Genes involved in ferrous iron oxidation of different physiological groups of the Fe(II) oxidizers.

| <b>Species</b>                        | <b>Physiology</b> | <b>Genes</b>                   | <b>Reference</b> |
|---------------------------------------|-------------------|--------------------------------|------------------|
| <i>Acidithiobacillus ferrooxidans</i> | Acidophilic       | <i>Cyc2, RusA, CycI, CycA1</i> | 1                |
| <i>Leptospirillum ferrooxidans</i>    | Acidophilic       | <i>Cyt572, Cyt579, CytC</i>    | 2                |
| <i>Sideroxydans lithotrophicus</i>    | Micro-aerobic     | <i>MtoB, MtoA, CymA</i>        | 3                |
| <i>Rhodopseudomonas palustris</i>     | Phototrophic      | <i>PioB, PioA, PioC</i>        | 4                |
| <i>Rhodobacter ferrooxidans</i>       | Phototrophic      | <i>FoxE, FoxY</i>              | 5                |

**Table S2.** Predicted cytochrome in *Rhodocyclaceae* sp. strain Paddy-1 from genome annotation.

| gene     | Gene Length | AA length | No. COG | No. Pfam | No. GO                             |
|----------|-------------|-----------|---------|----------|------------------------------------|
| ORF_0007 | 594         | 197       | NA      | PF00034  | GO:0009055, GO:0020037, GO:0005506 |
| ORF_0030 | 2091        | 696       | COG3258 | PF00034  | GO:0009055, GO:0020037, GO:0005506 |
| ORF_0340 | 423         | 140       | COG3245 | PF00034  | NA                                 |
| ORF_0414 | 927         | 308       | COG2010 | PF00034  | NA                                 |
| ORF_0454 | 573         | 190       | NA      | PF00034  | GO:0009055, GO:0020037, GO:0005506 |
| ORF_0621 | 432         | 143       | COG2010 | PF00034  | GO:0009055, GO:0020037, GO:0005506 |
| ORF_0861 | 327         | 108       | COG4654 | PF00034  | GO:0009055, GO:0020037, GO:0005506 |
| ORF_0875 | 309         | 102       | COG4654 | PF00034  | GO:0009055, GO:0020037, GO:0005506 |
| ORF_0877 | 678         | 225       | COG2863 | PF00034  | GO:0009055, GO:0020037, GO:0005506 |
| ORF_1199 | 645         | 214       | COG3245 | NA       | NA                                 |
| ORF_1372 | 438         | 145       | COG3245 | PF00034  | GO:0009055, GO:0020037, GO:0005506 |
| ORF_1447 | 678         | 225       | NA      | PF00034  | NA                                 |
| ORF_1451 | 1080        | 359       | COG4654 | PF00034  | NA                                 |
| ORF_1454 | 324         | 107       | COG2863 | PF00034  | GO:0009055, GO:0020037, GO:0005506 |
| ORF_1457 | 615         | 204       | COG2863 | PF00034  | GO:0009055, GO:0020037, GO:0005506 |
| ORF_1471 | 1719        | 572       | COG2010 | PF00034  | NA                                 |
| ORF_1632 | 429         | 142       | COG2010 | PF00034  | GO:0009055, GO:0020037, GO:0005506 |
| ORF_1636 | 315         | 104       | COG4654 | PF00034  | GO:0009055, GO:0020037, GO:0005506 |
| ORF_1687 | 720         | 239       | COG2857 | PF02167  | GO:0009055, GO:0020037, GO:0005506 |
| ORF_2104 | 978         | 325       | COG1858 | PF00034  | GO:0055114, GO:0016491             |
| ORF_2420 | 639         | 212       | COG2863 | PF00034  | GO:0009055, GO:0020037, GO:0005506 |
| ORF_2425 | 411         | 136       | COG3474 | PF00034  | GO:0009055, GO:0020037, GO:0005506 |
| ORF_2539 | 642         | 213       | COG2863 | PF00034  | GO:0009055, GO:0020037, GO:0005506 |
| ORF_2641 | 474         | 157       | NA      | PF01322  | GO:0009055, GO:0020037, GO:0005506 |
| ORF_2653 | 267         | 88        | NA      | PF00034  | GO:0009055, GO:0020037, GO:0005506 |
| ORF_2757 | 1260        | 419       | COG2863 | PF00034  | GO:0005507, GO:0004129, GO:0016020 |
| ORF_2759 | 624         | 207       | COG3175 | PF04442  | GO:0005507                         |
| ORF_2862 | 459         | 152       | COG3909 | PF01322  | GO:0009055, GO:0020037, GO:0005506 |
| ORF_2876 | 1698        | 565       | COG2010 | PF00034  | NA                                 |
| ORF_2882 | 399         | 132       | COG2010 | NA       | NA                                 |
| ORF_2894 | 1617        | 538       | COG2010 | PF00034  | NA                                 |

Description:

COG1858: Cytochrome c peroxidase; COG2010: Cytochrome c, mono- and diheme variants; COG2857: Cytochrome c1; COG2863: Cytochrome c553; COG3175: Cytochrome oxidase assembly factor; COG3245: Cytochrome c5; COG3258: Cytochrome c, mono- and diheme variants; COG3474: Cytochrome c2; COG3909: Cytochrome c556; COG4235: Cytochrome c biogenesis factor; COG4654: Cytochrome c551/c552.

PF00034: Cytochrome c; PF02167: Cytochrome C1 family; PF01322: Cytochrome C; PF04442: Cytochrome c

oxidase assembly protein CtaG/Cox11; PF07719: Tetratricopeptide repeat.

GO0004129: cytochrome-c oxidase activity; GO0005506: iron ion binding; GO0005507: copper ion binding; GO0009055: electron carrier activity; GO0016020: membrane; GO0016491: oxidoreductase activity; GO0020037: heme binding; GO0055114: oxidation reduction.

**Table S3.** Predicted Fe ion homeostasis systems in *Rhodocyclaceae* sp. strain Paddy-1 from genomic annotation.

(A) Ferredoxin Ferritin

| Gene     | Gene Length | AA length | No. COG | No. Pfam | No. GO                          |
|----------|-------------|-----------|---------|----------|---------------------------------|
| ORF_0190 | 353         | 118       | COG3411 | PF01257  | GO0051287, GO0055114, GO0016491 |
| ORF_0267 | 1436        | 479       | COG0716 | PF00258  | NA                              |
| ORF_0269 | 386         | 129       | COG2146 | NA       | GO0051537, GO0055114, GO0016491 |
| ORF_0415 | 1451        | 484       | COG0348 | PF11614  | NA                              |
| ORF_0547 | 470         | 157       | COG0783 | PF00210  | GO0006879, GO0008199            |
| ORF_0627 | 1025        | 342       | COG0348 | NA       | NA                              |
| ORF_0865 | 1163        | 388       | COG0633 | PF00111  | GO0055114, GO0016491            |
| ORF_1063 | 875         | 292       | COG0348 | NA       | NA                              |
| ORF_1248 | 308         | 103       | COG3411 | PF01257  | GO0051287, GO0055114, GO0016491 |
| ORF_1394 | 1490        | 497       | COG0348 | PF11614  | NA                              |
| ORF_1575 | 773         | 258       | COG1018 | NA       | GO0055114, GO0016491            |
| ORF_1672 | 1049        | 350       | COG0633 | PF00970  | GO0009055, GO0051536            |
| ORF_1696 | 371         | 124       | COG2146 | PF00355  | GO0051537, GO0055114, GO0016491 |
| ORF_2327 | 1112        | 371       | COG0276 | PF00762  | GO0004325, GO0006783            |
| ORF_2240 | 866         | 289       | COG1018 | PF00970  | GO0055114, GO0016491            |
| ORF_2262 | 323         | 108       | COG1146 | PF00037  | NA                              |
| ORF_3077 | 473         | 158       | COG2193 | PF00210  | GO0006879, GO0008199            |
| ORF_3169 | 341         | 114       | COG0633 | PF00111  | GO0009055, GO0051536            |
| ORF_3264 | 1370        | 457       | COG0348 | NA       | NA                              |

(B) Transporters of ferrous and ferric ion

| Gene     | Gene Length | AA length | No. COG | No. Pfam | No. GO               |
|----------|-------------|-----------|---------|----------|----------------------|
| ORF_0158 | 1013        | 338       | NA      | PF02421  | GO0005525, GO0005622 |
| ORF_0363 | 1109        | 370       | COG1840 | PF01547  | GO0005215            |
| ORF_0364 | 1709        | 570       | COG1178 | PF00528  | NA                   |
| ORF_0385 | 1346        | 449       | COG1160 | PF02421  | GO0005525, GO0005622 |
| ORF_0387 | 1268        | 423       | COG2262 | PF02421  | GO0005525, GO0005622 |
| ORF_0429 | 785         | 262       | COG0672 | FTR1     | GO0016020, GO0055085 |
| ORF_0568 | 1130        | 377       | COG0536 | PF02421  | GO0005525            |
| ORF_0728 | 1052        | 351       | COG1840 | PF01547  | GO0006810, GO0005215 |
| ORF_0731 | 1685        | 562       | COG1178 | PF00528  | NA                   |
| ORF_0844 | 929         | 310       | COG0614 | PF01497  | GO0006827, GO0005381 |
| ORF_0936 | 944         | 315       | COG1161 | PF02421  | NA                   |
| ORF_0995 | 542         | 181       | COG0735 | PF01475  | GO0006355, GO0003700 |
| ORF_1126 | 860         | 287       | COG0614 | PF01497  | GO0006827, GO0005381 |

|          |      |     |         |         |                               |
|----------|------|-----|---------|---------|-------------------------------|
| ORF_1211 | 1343 | 448 | COG4097 | PF01794 | GO0009055,GO0050660,GO0016021 |
| ORF_1315 | 1352 | 451 | COG0486 | PF02421 | NA                            |
| ORF_1744 | 977  | 326 | COG0609 | PF01032 | GO0016020,GO0006810,GO0005215 |
| ORF_1788 | 1091 | 364 | COG0012 | PF02421 | NA                            |
| ORF_2331 | 458  | 153 | COG0735 | PF01475 | GO0006355,GO0003700           |
| ORF_2503 | 1319 | 440 | COG4097 | PF01794 | GO0009055,GO0050660,GO0016021 |
| ORF_2543 | 674  | 225 | COG2717 | PF01794 | GO0009055,GO0050660,GO0016021 |
| ORF_3088 | 2831 | 944 | COG3064 | PF02421 | NA                            |
| ORF_3260 | 557  | 186 | COG3470 | PF10634 | NA                            |

Description:

COG0012: Predicted GTPase, probable translation factor; COG0276: Protoheme ferro-lyase (ferrochelataase); COG0348: Polyferredoxin; COG0486: Predicted GTPases; COG0536: Predicted GTPases; COG0609: ABC-type Fe<sup>3+</sup>-siderophore transport system, permease component; COG0614: ABC-type Fe<sup>3+</sup>-hydroxamate transport system, periplasmic component; COG0633: Ferredoxin; COG0672: High-affinity Fe<sup>2+</sup>/Pb<sup>2+</sup> permease; COG0716: Flavodoxins; COG0735: Fe<sup>2+</sup>/Zn<sup>2+</sup> uptake regulation proteins; COG0783: DNA-binding ferritin-like protein (oxidative damage protectant); COG1018: Flavodoxin reductases (ferredoxin-NADPH reductases) family 1; COG1146: Ferredoxin; COG1160: Predicted GTPases; COG1161: Predicted GTPases; COG1178: ABC-type Fe<sup>3+</sup> transport system, permease component; COG1840: ABC-type Fe<sup>3+</sup> transport system, periplasmic component; COG2146: Ferredoxin subunits of nitrite reductase and ring-hydroxylating dioxygenases; COG2193: Bacterioferritin (cytochrome b1); COG2262: Predicted GTPases; COG2717: Predicted membrane protein; COG3064: Membrane protein involved in colicin uptake; COG3411: Ferredoxin; COG3470: Uncharacterized protein probably involved in high-affinity Fe<sup>2+</sup> transport; COG4097: Predicted ferric reductase.

PF00037: 4Fe-4S binding domain; PF00111: 2Fe-2S iron-sulfur cluster binding domain; PF00175: Oxidoreductase NAD-binding domain; PF00210: Ferritin-like domain; PF00258: Flavodoxin; PF00355: Rieske [2Fe-2S] domain; PF00528: Binding-protein-dependent transport system inner membrane component; PF00762: Ferrochelataase; PF00970: Oxidoreductase FAD-binding domain; PF01032: FecCD transport family; PF01257: Respiratory-chain NADH dehydrogenase 24 Kd subunit; PF01475: Ferric uptake regulator family; PF01497: Periplasmic binding protein; PF01547: Bacterial extracellular solute-binding protein; PF01794: Ferric reductase like transmembrane component; PF02421: Ferrous iron transport protein B; PF10634: Fe<sup>2+</sup> transport protein; PF11614: Ubp3 associated protein Bre5.

GO0003700: transcription factor activity ; GO0004325: ferrochelataase activity ; GO0005215: transporter activity ; GO0005381: iron ion transmembrane transporter activity ; GO0005525: GTP binding ; GO0005622: intracellular ; GO0006355: regulation of transcription, DNA-dependent ; GO0006783: heme biosynthetic process ; GO0006810: transport ; GO0006827: high-affinity iron ion transport ; GO0006879: cellular iron ion homeostasis ; GO0008199: ferric iron binding ; GO0009055: electron carrier activity ; GO0016020: membrane ; GO0016021: integral to membrane ; GO0016491: oxidoreductase activity ; GO0050660: FAD binding ; GO0051287: NAD or NADH binding ; GO0051536: iron-sulfur cluster binding ; GO0051537: 2 iron, 2 sulfur cluster binding ; GO0055085: transmembrane transport ; GO0055114: oxidation reduction.

**Table S4.** Predicted iron oxidase and related electron transfer system in *Rhodocyclaceae* sp. strain Paddy-1 by comparing to other oxidizing bacteria.

| gene     | Gene Length | AA length | Most related protein                   | Similarity (E value) | Score (Bits) | No. COG | No. Pfam | No. GO                             |
|----------|-------------|-----------|----------------------------------------|----------------------|--------------|---------|----------|------------------------------------|
| ORF_0385 | 1346        | 449       | feoB ( <i>S. oneidensis</i> MR-1)      | 8.00E-08             | 103          | COG1160 | PF02421  | GO0005525, GO0005622               |
| ORF_0877 | 678         | 225       | cyc1 ( <i>A. ferrooxidans</i> 23270)   | 2.00E-19             | 181          | COG2863 | PF00034  | GO:0009055, GO:0020037, GO:0005506 |
| ORF_1061 | 674         | 225       | cymA ( <i>S. oneidensis</i> MR-1)      | 7.00E-23             | 203          | COG3005 | PF03264  | NA                                 |
| ORF_1454 | 324         | 107       | cycA-2 ( <i>A. ferrooxidans</i> 23270) | 2.00E-11             | 115          | COG2863 | PF00034  | GO:0009055, GO:0020037, GO:0005506 |
| ORF_1457 | 615         | 204       | cyc1 ( <i>A. ferrooxidans</i> 23270)   | 9.00E-32             | 265          | COG2863 | PF00034  | GO:0009055, GO:0020037, GO:0005506 |
| ORF_1788 | 1091        | 364       | feoB ( <i>S. oneidensis</i> MR-1)      | 1.00E-07             | 100          | COG0012 | PF02421  | NA                                 |
| ORF_2420 | 639         | 212       | cyc1 ( <i>A. ferrooxidans</i> 23270)   | 1.00E-39             | 319          | COG2863 | PF00034  | GO:0009055, GO:0020037, GO:0005506 |
| ORF_2421 | 1457        | 486       | cyc2 ( <i>A. ferrooxidans</i> 23270)   | 3.00E-33             | 306          | NA      | NA       | NA                                 |
| ORF_2539 | 642         | 213       | cycA-1 ( <i>A. ferrooxidans</i> 23270) | 1.00E-28             | 245          | COG2863 | PF00034  | GO:0009055, GO:0020037, GO:0005506 |
| ORF_2877 | 623         | 208       | cymA ( <i>S. oneidensis</i> MR-1)      | 1.00E-31             | 262          | COG3005 | PF03264  | NA                                 |

Description

COG0012: Predicted GTPase, probable translation factor; COG1160: Predicted GTPases; COG2863: Cytochrome c553; COG3005: Nitrate/TMAO reductases, membrane-bound tetraheme cytochrome c subunit.

PF00034: Cytochrome c; PF02421: Ferrous iron transport protein B; PF03264: NapC/NirT cytochrome c family, N-terminal region.

GO0005506: iron ion binding ; GO0005525: GTP binding ; GO0005622: intracellular ; GO0009055: electron carrier activity ; GO0020037: heme binding.

## Supplementary Figures

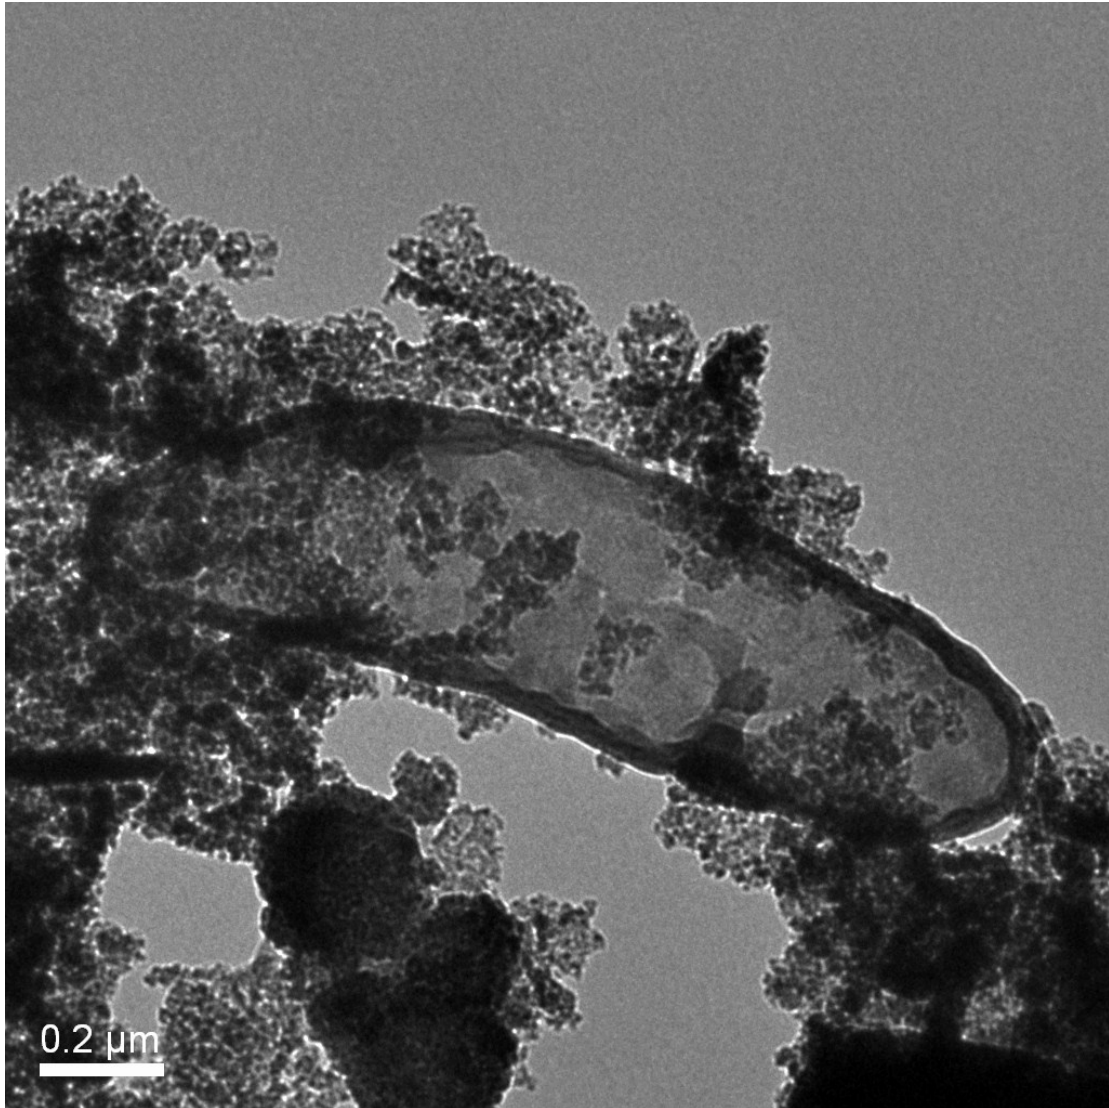

**Fig. S1** Transmission electron micrographs of a single cell of *Rhodocyclaceae* sp. strain Paddy-1 in the presence of 10 mM nitrate, 5 mM  $\text{FeCl}_2$  and 5 mM acetate at day 12 of incubation time.



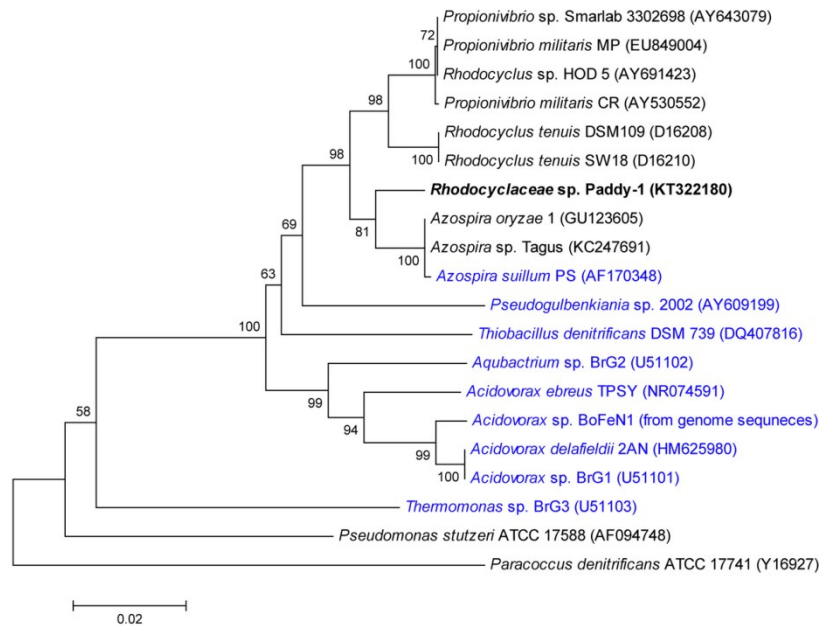

**Fig. S2** Neighbor-joining tree based on 16S rRNA sequences showing the phylogenetic affiliation of *Rhodocyclaceae* sp. strain Paddy-1 and evolutionary distance to other nitrate-reducing Fe(II)-oxidizing bacteria. Bootstrap values were determined on the basis of results of 1,000 replicates. Accession numbers are listed after the bacterium. The scale bar represents evolutionary distance as 0.02 change per nucleotide position. The numbers given are bootstrap values. Identified nitrate-dependent Fe(II)-oxidizing bacteria are shown in blue color of the font.

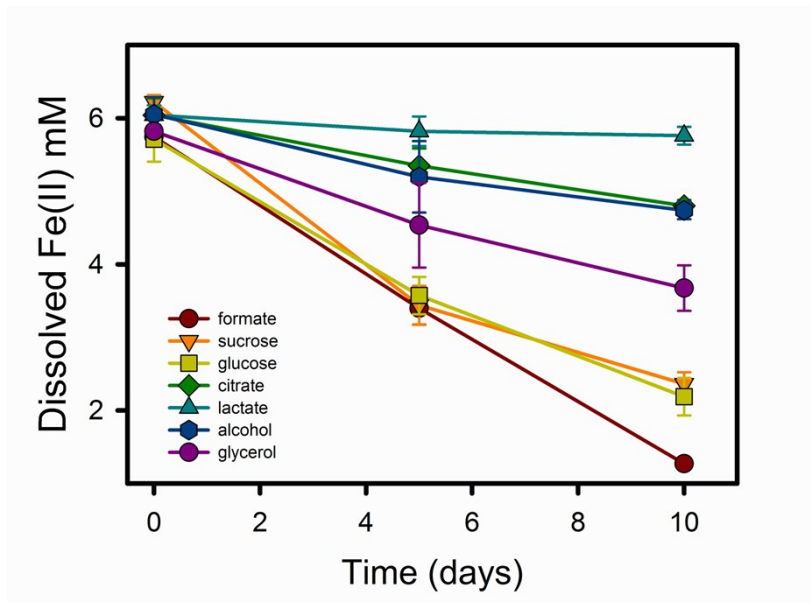

**Fig. S3** Oxidation of dissolved Fe(II) in cultures of the nitrate-reducing Fe(II)-oxidizing *Rhodocyclaceae* sp. strain Paddy-1 using different organic carbon (5 mM) as an electron donor. The prestarved cell ( $\sim 10^9$  cells mL<sup>-1</sup>) were cultured in the basal medium containing 5 mM Fe(II) and 10 mM of nitrate. Data were all presented as means  $\pm$  standard deviations (SD) of triplicate. When not shown, error bars are smaller than the symbol size.

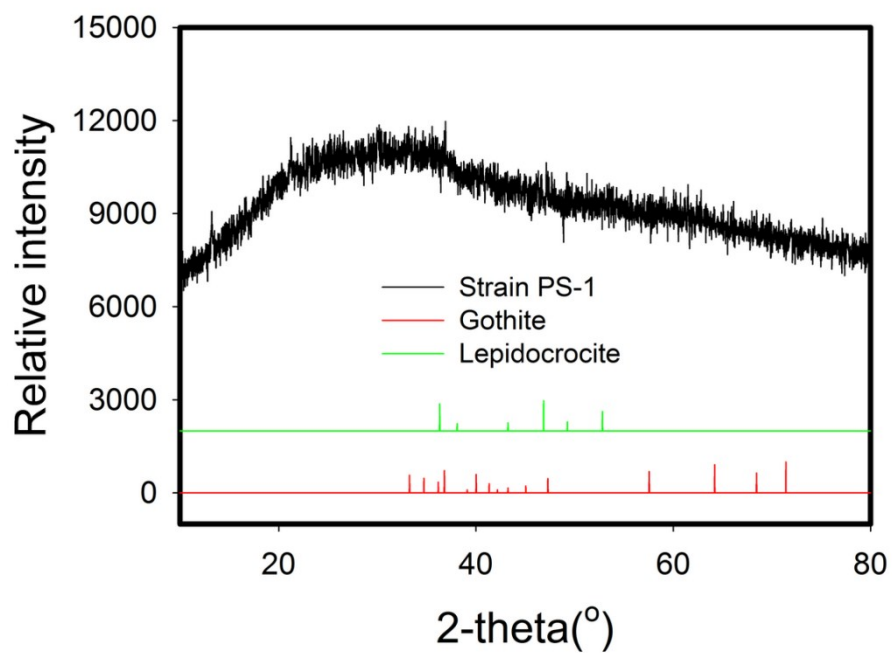

**Fig. S4** X-ray diffraction (XRD) spectrum of the *Rhodocyclaceae* sp. strain Paddy-1 culture. No distinct diffractive acuti-apices implies the formation of amorphous iron oxides.

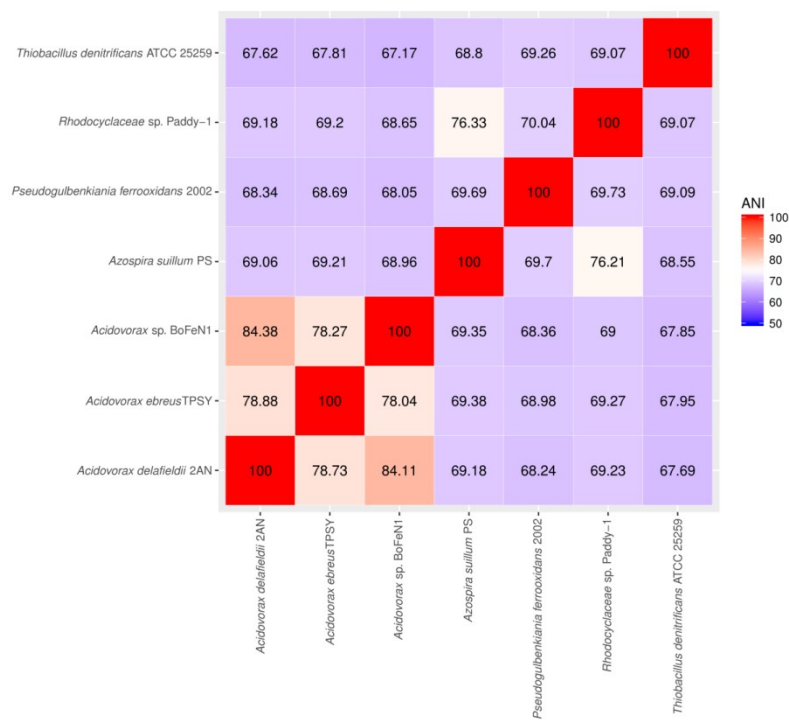

**Fig. S5** Results of ANI calculations using JSpecies software of strain Paddy-1 with respect to the reported nitrate-reducing Fe(II)-oxidizing species.

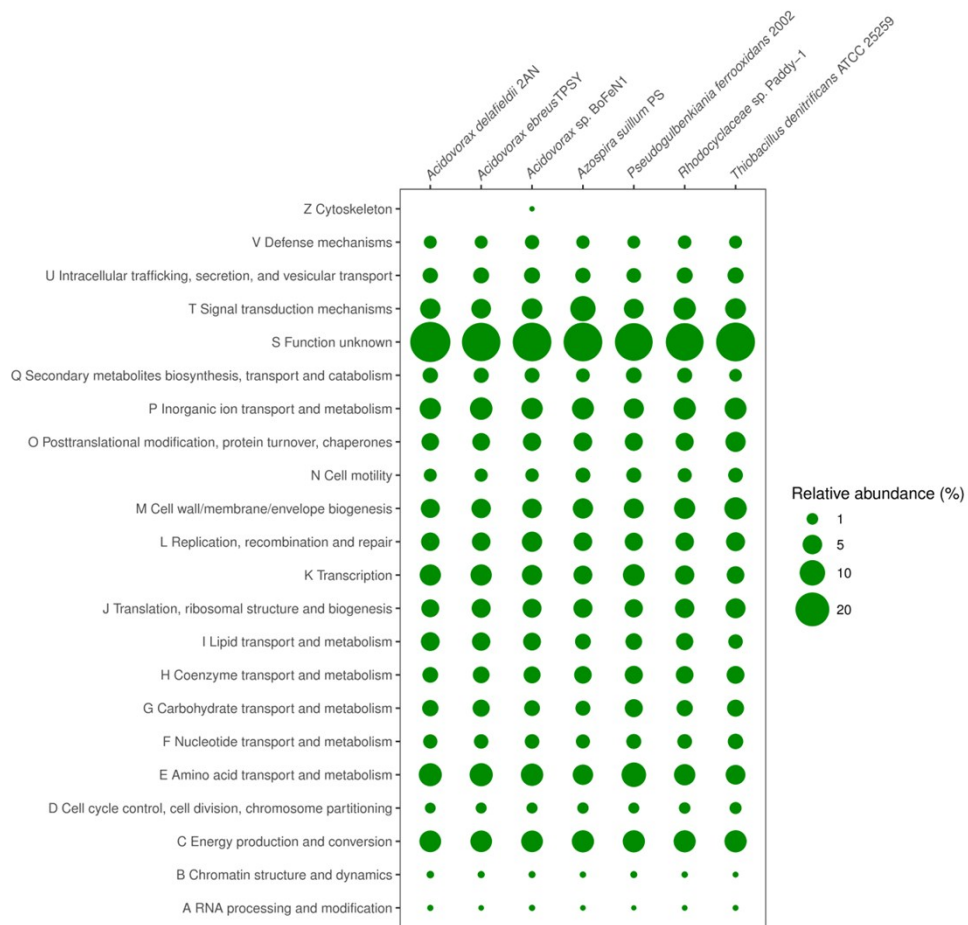

**Fig. S6** Egnog categories of the genes predicted from nitrate-reducing Fe(II)-oxidizers.

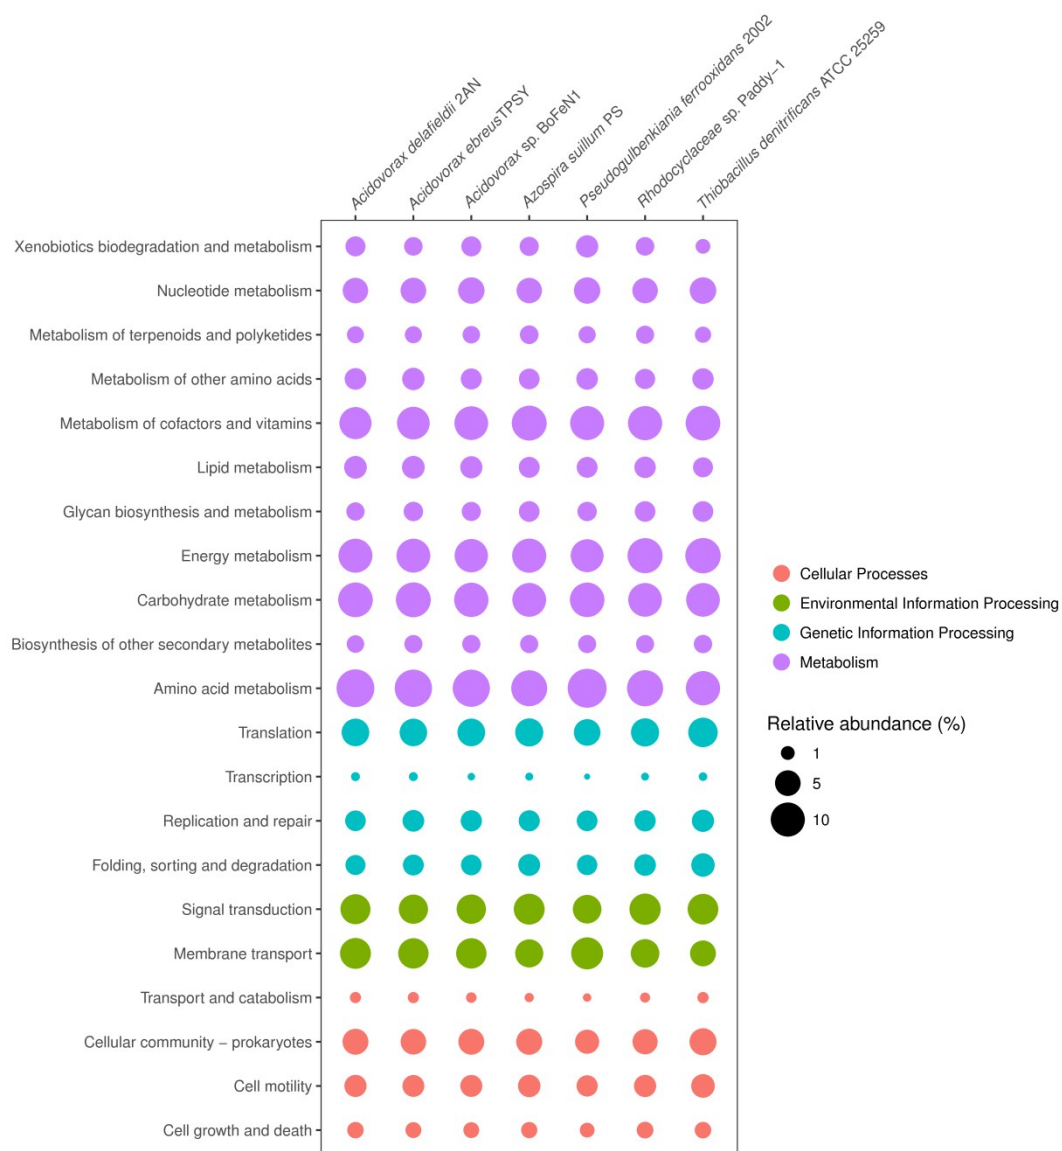

**Fig. S7** KEGG categories of the genes predicted from nitrate-reducing Fe(II)-oxidizers.

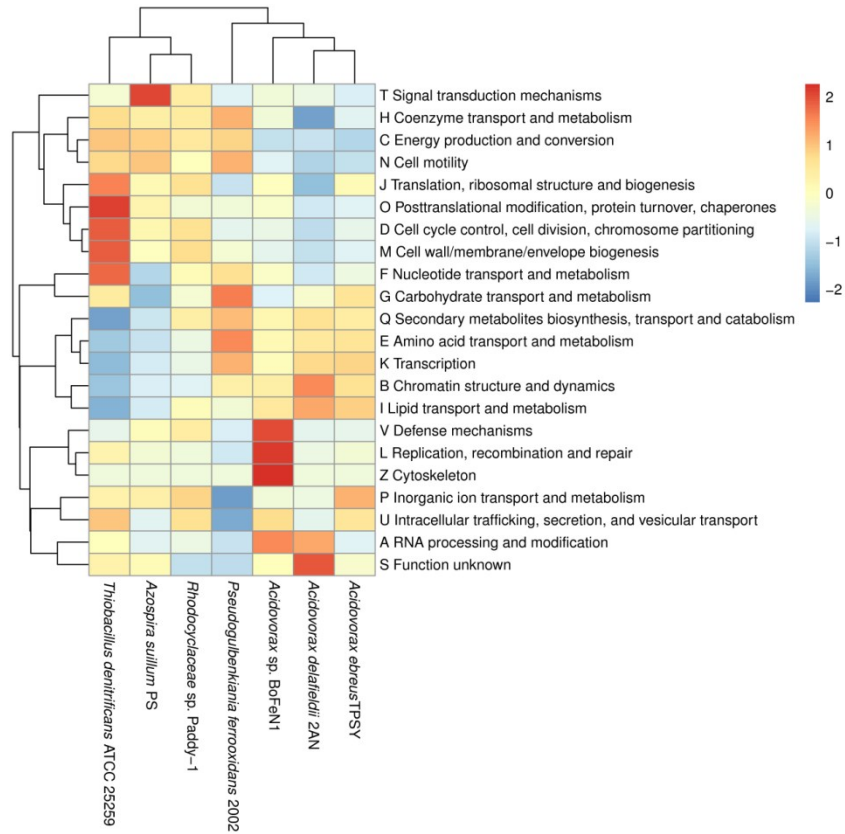

**Fig. S8** Clustering of the nitrate-reducing Fe(II)-oxidizers based on functional annotation of the genes by eggNOG database on the gene abundance. The color code indicates the relative abundance of the genes after z-score normalization.

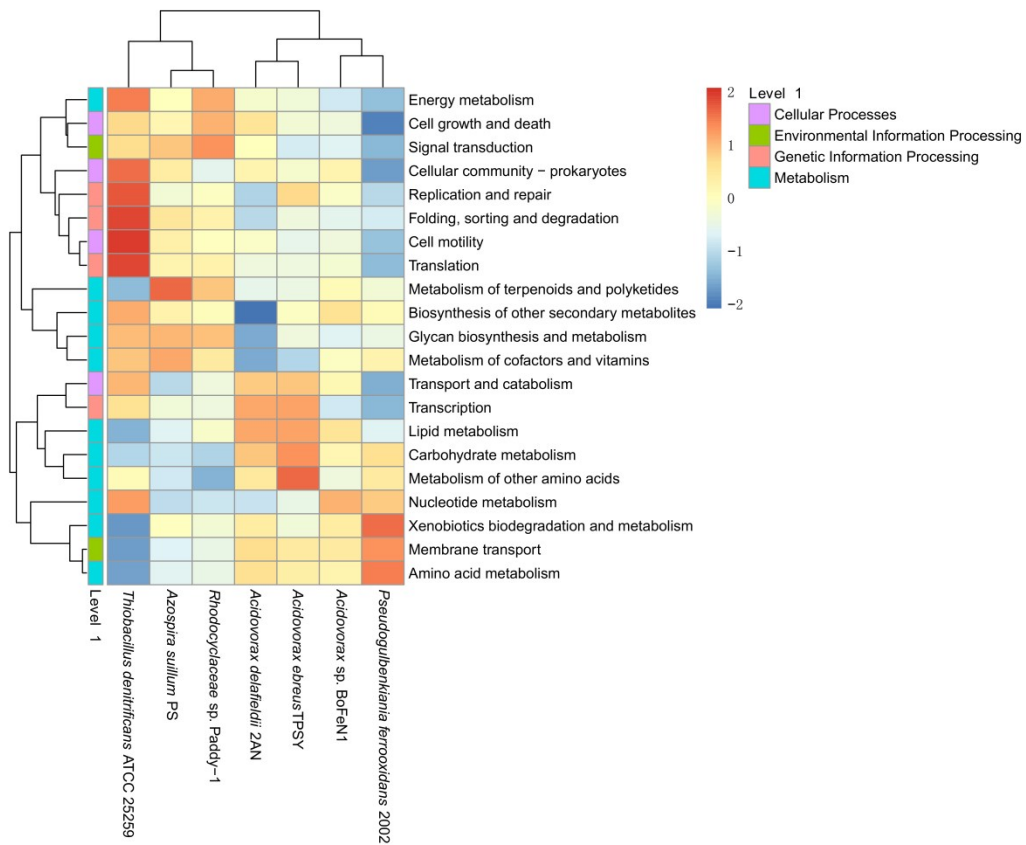

**Fig. S9** Clustering of the nitrate-reducing Fe(II)-oxidizers based on functional annotation of the genes by KEGG pathways on the gene abundance. The color code indicates the relative abundance of the genes after z-score normalization.



## REFERENCES

1. **Quatrini R, Appia-Ayme C, Denis Y, Jedlicki E, Holmes DS, Bonnefoy V.** Extending the models for iron and sulfur oxidation in the extreme acidophile *Acidithiobacillus ferrooxidans*. BMC Genomics 2009. **10**:394.
2. **Singer SW, Erickson BK, VerBerkmoes NC, Hwang M, Shah MB, Hettich RL, Banfield JF, Thelen MP.** Posttranslational modification and sequence variation of redox-active proteins correlate with biofilm life cycle in natural microbial communities, ISME J. 2010. **4**:1398–1409.
3. **Liu J, Wang Z, Belchik SM, Edwards MJ, Liu C, Kennedy DW, Merkley ED, Lipton MS, Butt JN, Richardson DJ, Zachara JM, Fredrickson JK, Rosso KM, Shi L.** Identification and characterization of MtoA: a decaheme c-type cytochrome of the neutrophilic Fe(II)-oxidizing bacterium *Sideroxydans lithotrophicus* ES-1. Front. Microbiol. 2012 **3**:37.
4. **Jiao Y, Newman DK.** The pio operon is essential for phototrophic Fe(II) oxidation in *Rhodopseudomonas palustris* TIE-1. J. Bacteriol. 2007. **189**:765–1773.
5. **Croal LR, Jiao Y, Newman DK.** The fox operon from *Rhodobacter* strain SW2 promotes phototrophic Fe(II) oxidation in *Rhodobacter capsulatus* SB1003. J. Bacteriol. 2007. **189**:1774–1782.
